# Supplementary material for: Partitioning of hydrogen peroxide in gas-liquid and gas-aerosol phases
Source: Copernicus journal article supplement (doi:10.5194/acp-2020-34), 2020-01-20
Supplement: Supplementary file [file acp-2020-34-AC2-supplement.pdf]

## Response to Reviewer #2

We gratefully thank you for your constructive comments and thorough review. Our point-by-point responses can be found below.

(Q=Question, A=Answer, C=Change in the revised manuscript)

Q1: This manuscript by Xuan et al describes a detailed study of the partitioning of  $\text{H}_2\text{O}_2$  in the atmosphere through field measurements. The authors quantified  $\text{H}_2\text{O}_2$  in the gas phase, aerosol, and rainwater (as a surrogate for cloud water). By comparing the measured and theoretical Henry's law constant, as well as the measured and theoretical partitioning coefficient, the authors conclude that the measured values for both are higher than the theoretical values. An in-depth assessment is conducted to evaluate the influence of raindrop falling on the quantified  $\text{H}_2\text{O}_2$  concentration, as well, a discussion on the source and sink of  $\text{H}_2\text{O}_2$  in aerosol is provided.  $\text{H}_2\text{O}_2$  plays an important role in the atmosphere, and understanding its partitioning in different atmospheric phases is of great importance for the atmospheric chemistry community. The manuscript is within the scope of ACP. The data analysis and calculation were performed with caution. I recommend publication on ACP after addressing the following comments.

A1: We highly appreciate your comments and suggestions. The questions you mentioned are specifically answered as follows.

### Major comment:

Q2. In section 3.2.4, the authors present the evolution of  $\text{H}_2\text{O}_2$  as a function of time in the aerosol abstract, and a detailed discussion on the potential source of  $\text{H}_2\text{O}_2$ . This result highlights the challenges in making off-line  $\text{H}_2\text{O}_2$  measurement from filter samples. Especially, when the sampling time is as long as 11.5 h (Line 100), it is very likely that the organic peroxides present in the aerosol sample is continuously decomposing on the filter. The authors categorize the  $\text{H}_2\text{O}_2$  evolution into three types and postulate the relevant source of  $\text{H}_2\text{O}_2$  for each type. However, in my opinion, this appears too speculative. The decomposition of  $\text{H}_2\text{O}_2$  on filter is difficult to control, and the quantified  $\text{H}_2\text{O}_2$  could be merely a snapshot of an ongoing decomposition process. The authors must justify whether it is valid at all to establish gas-aerosol partitioning of  $\text{H}_2\text{O}_2$  based on the current technique.

A2: Thanks for your suggestion. We have deleted the relevant source of  $\text{H}_2\text{O}_2$  in each type in Table 4 in the revised manuscript. Because organic peroxides are unstable and can easily decompose, off-line

measurement of the aerosol-phase  $\text{H}_2\text{O}_2$  could only obtain a snapshot of the decomposition process. Although there may be uncertainties regarding the aerosol-phase  $\text{H}_2\text{O}_2$  measurement and the calculation of gas-aerosol partitioning coefficient of  $\text{H}_2\text{O}_2$ , this paper provides new insights into understanding the gas-aerosol partitioning of  $\text{H}_2\text{O}_2$ , as well as the sources and sinks of aerosol-phase  $\text{H}_2\text{O}_2$ , which may contribute to the future studies related.

Provided that the influence of Teflon filters on the reactions of aerosol particles is so little as to be unnoticeable, the decomposition/hydrolysis rates of organic peroxides in aerosol particles on the filters are same as that in the atmosphere. It is well known that the decomposition/hydrolysis rates of organic peroxides are often positively related to the levels of organic peroxides. Due to the low aerosol water content of particles, the concentrations of aerosol-phase organic peroxides were  $\sim 5$  orders of magnitude higher than that in the extracted solution, which were estimated based on a comparison between the amount of the extracted solution and aerosol water content. The actual decomposition/hydrolysis rates in aerosol particles may be higher than that in the extracted solution. However, we cannot know how much the difference between them due to the limitations of the available measurement technique. Based on above analysis, to a large extent, the effective gas-aerosol partitioning coefficient estimated in this paper can represent the actual gas-aerosol partitioning of  $\text{H}_2\text{O}_2$ .

Furthermore, it took around 40 min to extract and transport the sample to the observation site for  $\text{H}_2\text{O}_2$  measurement. Organic peroxides in the extracted solution may decompose into  $\text{H}_2\text{O}_2$  during the process, leading to overestimation of the effective gas-aerosol partitioning coefficient of  $\text{H}_2\text{O}_2$ . Provided that the maximum decomposition/hydrolysis rate of organic peroxides was  $0.10 \text{ ng } \mu\text{g}^{-1} \text{ h}^{-1}$  (line 355 in the revised manuscript), the corrected gas-aerosol partitioning coefficient averaged  $6.9 \times 10^{-4} \text{ m}^3 \mu\text{g}^{-1}$ , which was the lowest value due to the assumed maximum value of the decomposition/hydrolysis rate of organic peroxides. Because the corrected value of the effective gas-aerosol partitioning coefficient was still much higher than  $K_p^t$ , we did not correct the data. The above analysis has been added in the Supplement (lines 158–168).

In addition, the level of gas-phase  $\text{H}_2\text{O}_2$  during BJ-2018Winter was very low, only tens of pptv. Lengthening sampling time will increase the aerosol-phase  $\text{H}_2\text{O}_2$  concentration and ensure accurate quantitative detection of  $\text{H}_2\text{O}_2$ , but it will also introduce some unknown errors. Therefore, we will comprehensively consider to determine an optimal sampling time in the future study of the gas-aerosol partitioning of  $\text{H}_2\text{O}_2$ .

**Minor comments:**

Q3. Literature-reported Henry's law constants of  $\text{H}_2\text{O}_2$  varies across a certain range. The authors should justify why they used  $8.4 \times 10^4 \text{ M/atm}$ . Is this the recommended value by the JPL publication?

A3: Thanks for your suggestion. Henry's law constant of  $\text{H}_2\text{O}_2$  ( $8.4 \times 10^4 \text{ M atm}^{-1}$ ) used in this paper was quoted from Sander et al. (2011), which was published in JPL Publication 10-6. In addition, Sander (2015) sorted Henry's law constants of  $\text{H}_2\text{O}_2$  based on the data reliability, and  $8.4 \times 10^4 \text{ M atm}^{-1}$  ranked higher. In addition, the latest recommended value was  $8.7 \times 10^4 \text{ M atm}^{-1}$  at 298 K (Burkholder et al., 2015), which was close to  $8.4 \times 10^4 \text{ M atm}^{-1}$  used in this paper.

Q4. Line 139 – Is the  $\text{PM}_{2.5}$  concentration a good indicator for  $C_{\text{om}}$  in a polluted environment like Beijing?

A4: Thanks for your suggestion. In previous studies, they used TSP in calculating the field-derived gas-aerosol partitioning coefficient and assumed that the weight fraction of the organic matter phase in TSP was 1 (Pankow et al., 1994; Odum et al., 1996; Shen et al., 2018; Qian et al., 2019). We have replaced " $C_{\text{om}}$ " with "TSP" in Eq. (4) in the revised manuscript, and used the  $\text{PM}_{2.5}$  mass concentration since TSP concentration was not available.

Q5. Line 150 – The authors state that when  $H_A^m$  was less than  $H_A^t$ , the samples followed Henry's law. Why? Shouldn't they agree (neither higher nor lower)?

A5: Thanks for your suggestion. The previous expression was inappropriate and we have redefined whether rain samples followed Henry's law in the revised manuscript.

C5: Lines 168–171 in Sec. 3.1.1:

"We divided 52 rain samples into three types based on the comparison of the measured and predicted levels of  $\text{H}_2\text{O}_2$ . When the difference between levels of the measured and predicted liquid-phase  $\text{H}_2\text{O}_2$  fell within  $\pm 20 \%$ , we suggested that these samples (Type B) followed Henry's law, and the remaining samples (Type A and C) did not agree with Henry's law. The percentages of samples in Type A, B and C were 69 %, 19 %, and 12 %, respectively."

Q6. Line 275 – The authors report here that heterogeneous uptake can count for 86% of aerosol phase  $\text{H}_2\text{O}_2$ . Later in Line 346, the author report 0.5%. Please clarify.

A6: Thanks for your suggestion. The two percentages are calculated in different methods. 86 % refers to the ratio of the amount of heterogeneous uptake of  $\text{H}_2\text{O}_2$  to the measured aerosol-phase  $\text{H}_2\text{O}_2$  level, while 0.5 % refers to the ratio of the amount of heterogeneous uptake of  $\text{H}_2\text{O}_2$  to the consumption amount of aerosol-phase  $\text{H}_2\text{O}_2$ . In addition, we have reevaluated the contribution of the heterogeneous uptake to the aerosol-phase  $\text{H}_2\text{O}_2$  based on the formation and consumption rates according to the reviewers' suggestions, and the heterogeneous uptake could account for 2 % of the consumption rate of the aerosol-phase  $\text{H}_2\text{O}_2$ . To avoid confusion, we have removed 86 % in Sec. 3.2.3 and 0.5 % in Sec. 3.3.

Q7. Line 370 – correct me if I am wrong. “additional source of liquid-phase  $\text{H}_2\text{O}_2$  gradually increased” – should this be the sink of  $\text{H}_2\text{O}_2$  due to droplet-to-gas transfer is gradually reduced?

A7: Yes, you are right. We have rewritten the description in the revised manuscript.

C7: Lines 450–451 in Sec. 4:

“In addition, the sink of  $\text{H}_2\text{O}_2$  due to droplet-to-gas transfer was reduced with an increase in raindrop diameter, thus the liquid-phase  $\text{H}_2\text{O}_2$  level also increased.”

Q8. Figure 5, and Line 263 – the authors interpret the inversely related  $\text{H}_2\text{O}_2$  concentration and  $\text{PM}_{2.5}$ /sulfate concentrations as results of a  $\text{H}_2\text{O}_2$  sink by  $\text{SO}_2$  oxidation. However, could the inversed relation be just due to dilution of  $\text{H}_2\text{O}_2$  when aerosol loading is high?

A8: Thanks for your suggestion. We did not consider the dilution of  $\text{H}_2\text{O}_2$  due to an increase in aerosol loading, and we have added it in the revised manuscript. To avoid the effects of outliers, we chose 10<sup>th</sup> and 90<sup>th</sup> percentiles of the levels of aerosol-phase  $\text{H}_2\text{O}_2$ ,  $\text{SO}_4^{2-}$  and  $\text{PM}_{2.5}$  to explain the inverse relationship between  $\text{H}_2\text{O}_2$  and  $\text{SO}_4^{2-}/\text{PM}_{2.5}$ . The extent of the concentration variations of  $\text{H}_2\text{O}_2$ ,  $\text{SO}_4^{2-}$  and  $\text{PM}_{2.5}$  were 22, 6 and 5, respectively. Because the level of  $\text{H}_2\text{O}_2$  changed more than that of  $\text{SO}_4^{2-}$  and  $\text{PM}_{2.5}$ , the inverse relationship still existed when we eliminated the interference of the dilution effect due to the high aerosol loading. In addition, the ratios of the extent of the concentration variations between  $\text{H}_2\text{O}_2$  and  $\text{SO}_4^{2-}/\text{PM}_{2.5}$  were equal to 4, indicating that a  $\text{H}_2\text{O}_2$  sink by  $\text{SO}_2$  oxidation was more important than the dilution effect and the dilution effect could be neglected.

C8: Lines 303–306 in Sec. 3.2.2:

“The extent of the concentration variations of  $\text{H}_2\text{O}_2$ ,  $\text{SO}_4^{2-}$  and  $\text{PM}_{2.5}$  at 10<sup>th</sup> and 90<sup>th</sup> percentiles were 22, 6 and 5, respectively, suggesting that the inverse relationship still existed when we eliminated the

interference of the dilution effect due to a high aerosol loading. The dilution effect was unimportant and could be neglected.”

#### Technical comments:

Q9. Line 59 – “easily to absorbed” to “easily absorbed”.

A9: Yes, we have revised it in line 65.

Q10. Line 144 – “statistically counted” appears awkward. Should probably remove.

A10: Yes, we have removed it in line 160.

Q11. Line 146 – “with” 25.20  $\mu\text{M}$  – is 25.20  $\mu\text{M}$  the theoretical value? “with” makes the sentence unclear.

A11: Yes, we have replaced “with” with “is” in line 162.

Q12. Line 171 – “almost” less than 2000 m – should this be “always” less than 2000 m?

A12: Yes, we have changed “almost” into “always” in line 194.

#### References

- Burkholder, J. B., Sander, S. P., Abbatt, J. P. D., Barker, J. R., Huie, R. E., Kolb, C. E., Kurylo, M. J., Orkin, V. L., Wilmouth, D. M., and Wine, P. H.: Chemical kinetics and photochemical data for use in atmospheric studies, Evaluation No. 18, JPL Publication 15-10, Jet Propulsion Laboratory, Pasadena, <http://jpldataeval.jpl.nasa.gov> (last access: 19 March 2020), 2015.
- Odum, J. R., Hoffmann, T., Bowman, F., Collins, D., Flagan, R. C., and Seinfeld, J. H.: Gas/particle partitioning and secondary organic aerosol yields, *Environ. Sci. Technol.*, 30, 2580–2585, <https://doi.org/10.1021/es950943+>, 1996.
- Pankow, J. F.: An absorption model of gas-particle partitioning of organic compounds in the atmosphere, *Atmos. Environ.*, 28, 185–188, [https://doi.org/10.1016/1352-2310\(94\)90093-0](https://doi.org/10.1016/1352-2310(94)90093-0), 1994.
- Qian, X., Shen, H. Q., and Chen, Z. M.: Characterizing summer and winter carbonyl compounds in Beijing atmosphere, *Atmos. Environ.*, 214, 116845, <https://doi.org/10.1016/j.atmosenv.2019.116845>, 2019.
- Sander, R.: Compilation of Henry’s law constants (version 4.0) for water as solvent, *Atmos. Chem. Phys.*,

15, 4399–4981, <https://doi.org/10.5194/acp-15-4399-2015>, 2015.

Sander, S. P., Abbatt, J., Barker, J. R., Burkholder, J. B., Friedl, R. R., Golden, D. M., Huie, R. E., Kolb, C. E., Kurylo, M. J., Moortgat, G. K., Orkin, V. L., and Wine, P. H.: Chemical kinetics and photochemical data for use in atmospheric studies, Evaluation No. 17, JPL Publication 10-6, Jet Propulsion Laboratory, Pasadena, <http://jpldataeval.jpl.nasa.gov> (last access: 19 March 2020), 2011.

Shen, H. Q., Chen, Z. M., Li, H., Qian, X., Qin, X., and Shi, W. X.: Gas-particle partitioning of carbonyl compounds in the ambient atmosphere, *Environ. Sci. Technol.*, 52, 10997–11006, <https://doi.org/10.1021/acs.est.8b01882>, 2018.

**Table 4: Comparison of the H<sub>2</sub>O<sub>2</sub> evolution parameters in the extracted solution among the three types.**

| Parameters                                                                                                         | First type | Second type | Third type |
|--------------------------------------------------------------------------------------------------------------------|------------|-------------|------------|
| Peak time (h)                                                                                                      | 5          | 40          | –          |
| Decomposition rate of organic peroxides to H <sub>2</sub> O <sub>2</sub> (ng<br>μg <sup>-1</sup> h <sup>-1</sup> ) | 0.01       | 0.10        | –          |
| $C_{max}/C_0$ of H <sub>2</sub> O <sub>2</sub> (μM/μM)                                                             | 1.52       | 39.22       | 1.00       |
| TPOs/H <sub>2</sub> O <sub>2</sub> (μM/μM)                                                                         | 5.25       | 40.06       | 47.59      |
| Ratio of decomposable organic peroxides (%)                                                                        | 29         | 98          | 0          |
